# Supplementary material for: Satellite Observations of Water Origins Reveal New Dimensions of Hydroclimate Vulnerability of Global Croplands
Source: Research Square preprint supplement (doi:10.21203/rs.3.rs-4366139/v1), 2024-05-31
Supplement: Supplementary file 1 [file 076ccb3048572ebf7a57bc2e.docx]

**Supplementary Information**

**Satellite Observations of Water Origins Reveal New Dimensions of Hydroclimate Vulnerability of Global Croplands**

**Yan Jiang1,2,*, Jennifer A. Burney1,2,***

*1School of Global Policy and Strategy, University of California San Diego, La Jolla, CA, USA 92093*

*2Scripps Institution of Oceanography, University of California San Diego, La Jolla, CA, USA 92093*

**Tables**

**Supplementary Table 1. Parameter estimates from the multiple linear regression for all crop grids.**

| Climate indices | NIRv_max | | |
| --- | --- | --- | --- |
| all | *f* 40% | *f* < 40% |
| Rainwater (vegetative)  Rainwater (reproductive)  RZSM (vegetative)  RZSM (reproductive) | 0.1 (± 0.01)**  0.02 (± 0.01)  0.05 (± 0.012)**  0.17 (± 0.013)** | 0.14 (± 0.014)**  0.02 (± 0.015)  0.05 (± 0.017)**  0.25 (± 0.02)** | 0.04 (± 0.014)**  0.01 (± 0.015)  0.03 (± 0.016)*  0.1 (± 0.017)** |
| R2 | 0.07 | 0.15 | 0.02 |

**Note:** Values are estimated coefficients with standard errors in parentheses. “*” indicates that the coefficient is significant at 90% confidence level. “**” indicates that the coefficient is significant at 99% confidence level.

**Supplementary Table 2. Parameter estimates from the multiple linear regression for maize.**

| Climate indices | NIRv_max | | |  |
| --- | --- | --- | --- | --- |
| all | *f* 40% | | | |
| Rainwater (vegetative)  Rainwater (reproductive)  RZSM (vegetative)  RZSM (reproductive) | 0.08 (± 0.012)**  0.01 (± 0.012)  0.02 (± 0.014)*  0.15 (± 0.015)** | | 0.13 (± 0.018)**  -0.02 (± 0.019)  0.00 (± 0.022)  0.26 (± 0.024)** | | |
| R2 | 0.04 | | 0.11 | | |

**Note:** Values are estimated coefficients with standard errors in parentheses. “*” indicates that the coefficient is significant at 90% confidence level. “**” indicates that the coefficient is significant at 99% confidence level.

**Supplementary Table 3. Parameter estimates from the multiple linear regression for rice.**

| Climate indices | NIRv_max | | |  |
| --- | --- | --- | --- | --- |
| all | *f* 40% | | | |
| Rainwater (vegetative)  Rainwater (reproductive)  RZSM (vegetative)  RZSM (reproductive) | 0.04 (± 0.021)*  0.03 (± 0.012)  0.01 (± 0.024)  0.09 (± 0.027)** | | 0.20 (± 0.052)**  0.03 (± 0.055)  -0.03 (± 0.06)  0.24 (± 0.067)** | | |
| R2 | 0.02 | | 0.13 | | |

**Note:** Values are estimated coefficients with standard errors in parentheses. “*” indicates that the coefficient is significant at 90% confidence level. “**” indicates that the coefficient is significant at 99% confidence level.

**Supplementary Table 4. Parameter estimates from the multiple linear regression for soybean.**

| Climate indices | NIRv_max | | |  |
| --- | --- | --- | --- | --- |
| all | *f* 40% | | | |
| Rainwater (vegetative)  Rainwater (reproductive)  RZSM (vegetative)  RZSM (reproductive) | 0.05 (± 0.016)**  0.02 (± 0.012)  0.05 (± 0.018)*  0.12 (± 0.020)** | | 0.09 (± 0.025)**  -0.03 (± 0.025)  -0.00 (± 0.030)  0.25 (± 0.033)** | | |
| R2 | 0.03 | | 0.08 | | |

**Note:** Values are estimated coefficients with standard errors in parentheses. “*” indicates that the coefficient is significant at 90% confidence level. “**” indicates that the coefficient is significant at 99% confidence level.

**Supplementary Table 5. Parameter estimates from the multiple linear regression for winter wheat.**

| Climate indices | NIRv_max | | |  |
| --- | --- | --- | --- | --- |
| all | *f* 40% | | | |
| Rainwater (vegetative)  Rainwater (reproductive)  RZSM (vegetative)  RZSM (reproductive) | 0.12 (± 0.013)**  0.03 (± 0.014)*  0.04 (± 0.016)*  0.23 (± 0.018)** | | 0.16 (± 0.017)**  0.02 (± 0.018)  0.03 (± 0.022)  0.31 (± 0.025)** | | |
| R2 | 0.12 | | 0.19 | | |

**Note:** Values are estimated coefficients with standard errors in parentheses. “*” indicates that the coefficient is significant at 90% confidence level. “**” indicates that the coefficient is significant at 99% confidence level.

**Figures**


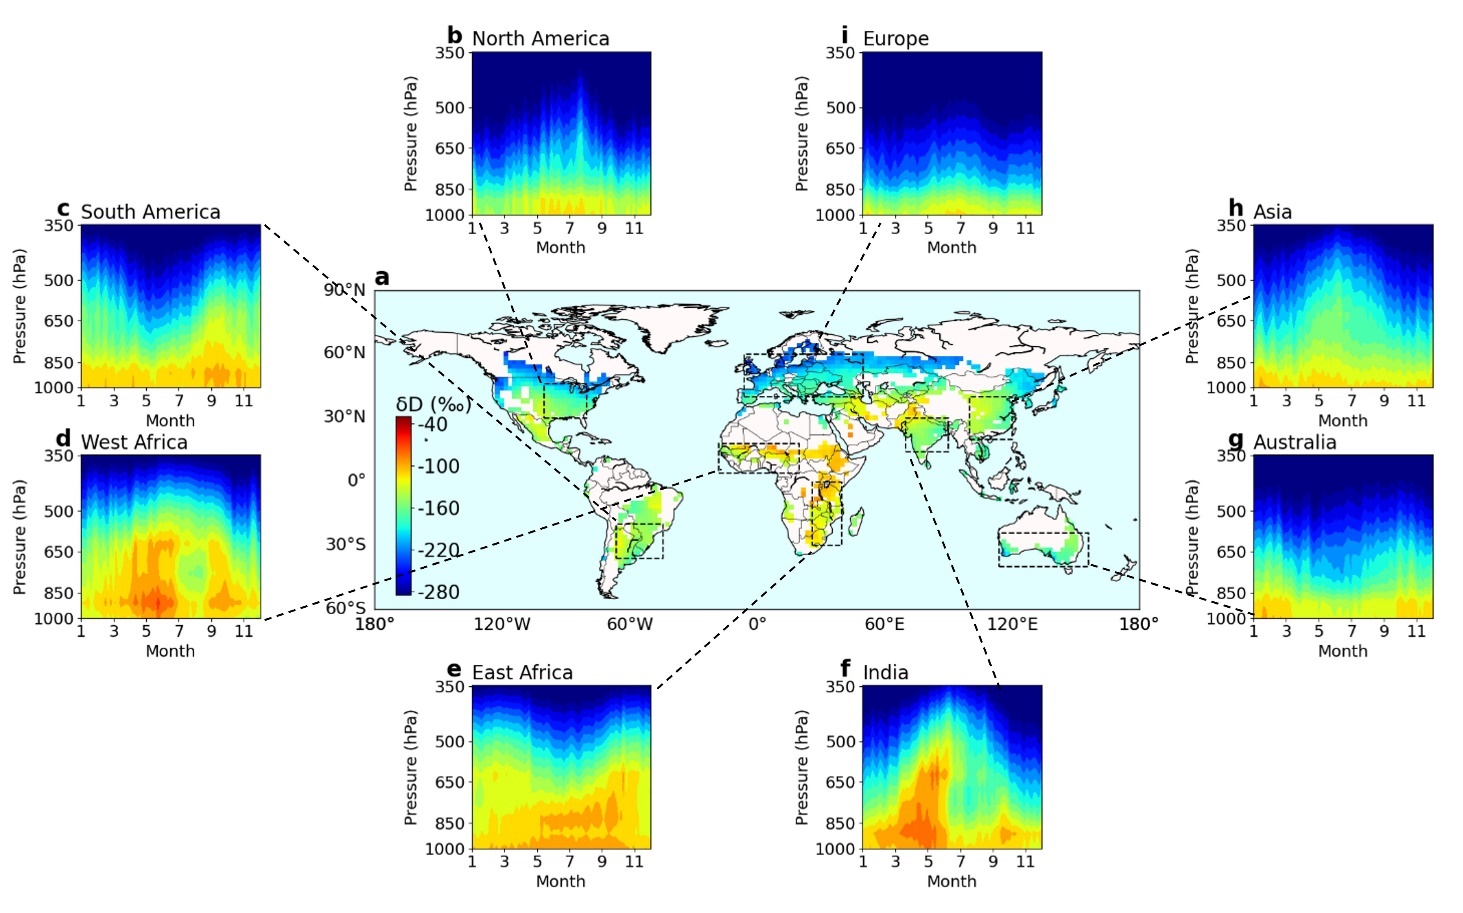


***Supplementary Figure 1*: Spatial and vertical patterns of (unit: ‰) during 2005-2011 from AIRS observations.** **a,** Global distribution of averaged vertically between 900 and 600hPa during the growing season. **b-i,** Long-term mean annual vertical profiles of over breadbaskets including North America, South America, West Africa, East Africa, India, Australia, Asia, and Europe.


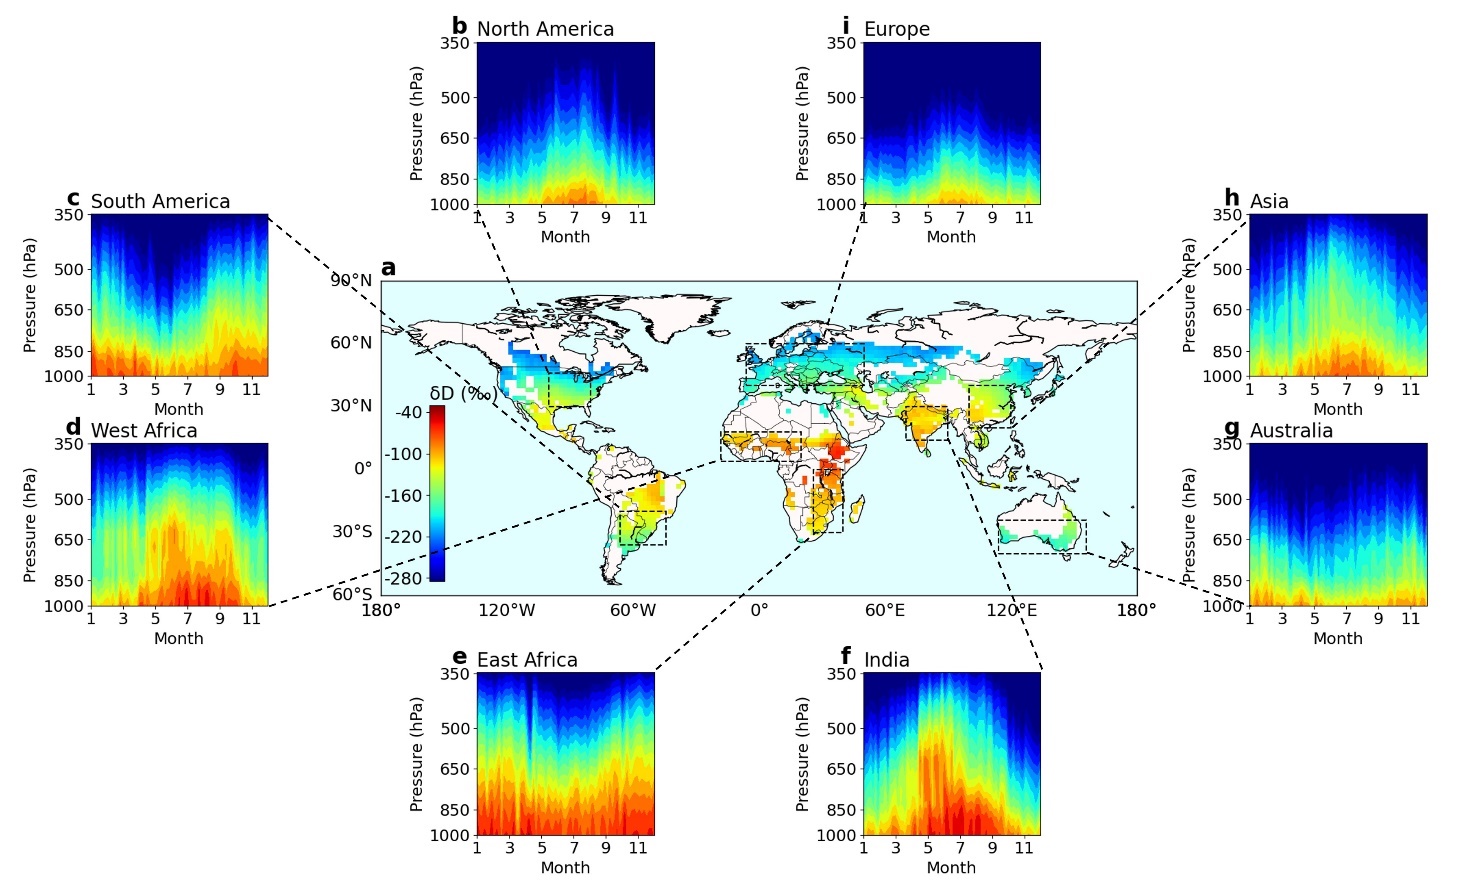


***Supplementary Figure 2*: The same as Supplementary Fig. 1, but estimated based on TES observations.**


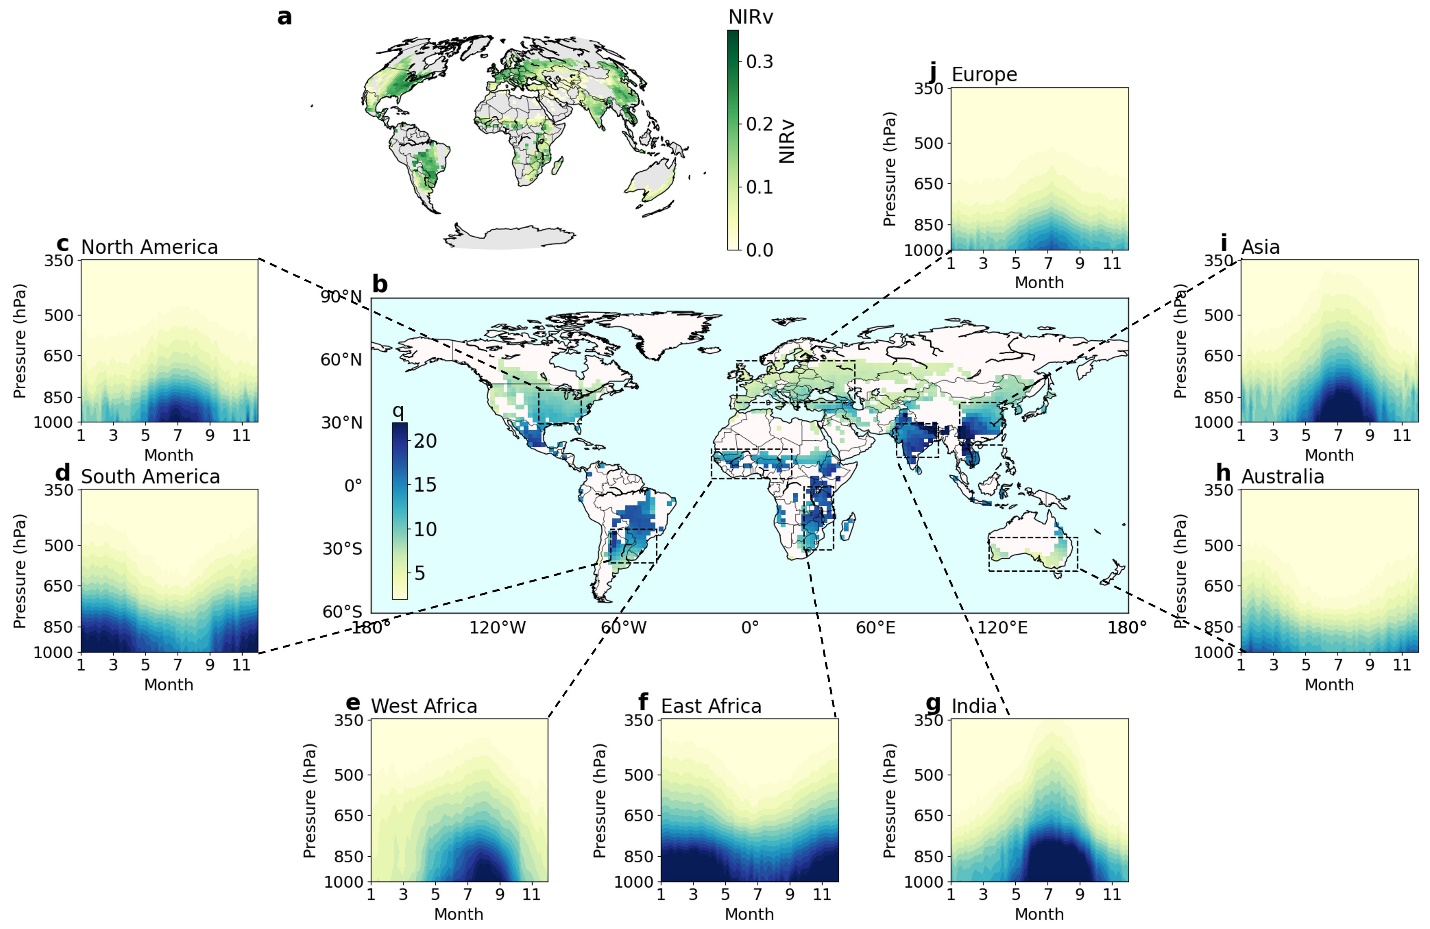


***Supplementary Figure 3*: Spatial and vertical patterns of (unit: g/kg) during 2003-2019 from AIRS observations.** **a,** Studied croplands estimated by the cropland extent dataset and corresponding mean NIRv values (unitless) during the growing season. **b,** Global distribution of averaged vertically between 900 and 600hPa during the growing season. **c-j,** Long-term mean annual vertical profiles of over breadbaskets including North America, South America, West Africa, East Africa, India, Australia, Asia, and Europe.


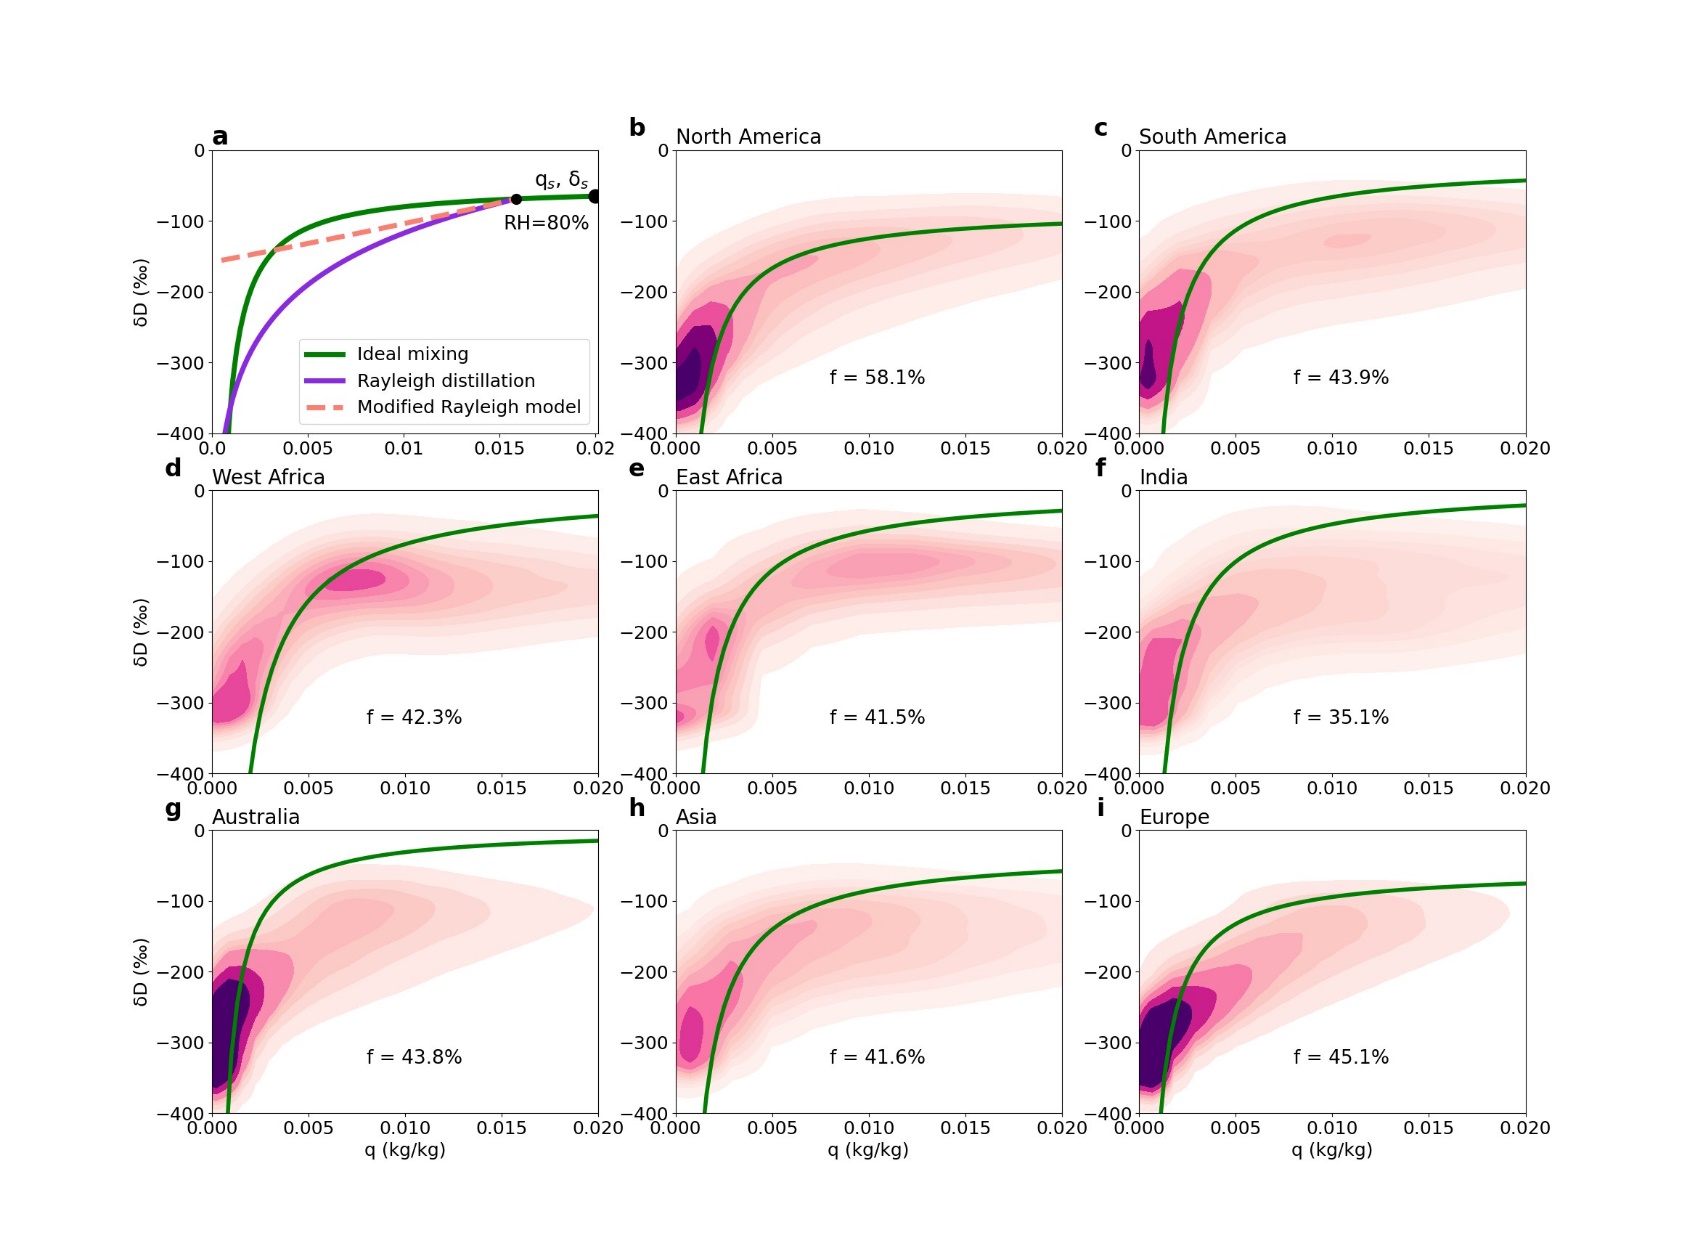


***Supplementary Figure 4*: Theoretical models of hydrologic processes and scatter plots of versus *q*. a,** Theoretical predictions of the evolution of as a function of *q*.The joint dot of the three curves (*qs*, s) is set as the original air mass that has 80% relative humidity relative to equilibrium with an ocean source and an assumed temperature of 300 K following Noone1. The green line represents evaporation as mixing with vapor in equilibrium with the source air mass (*qs*, s). When the air mass originates from terrestrial transpiration, it is more enriched and can represent an upper bound of all hydrologic processes. The purple curve represents the Rayleigh distillation as a pseudo adiabatic process, during which all moisture precipitates out of the air mass. The dashed pink line shows the case of a reversible moist adiabatic process, during which the condensation is to ice and irreversible. Joint distribution of and *q* in the troposphere (908-348 hPa) based on AIRS observations during 2003-2019 over **b,** North America (30N-46N, 100W-80W), **c,** South America(36S-18S 66W-44W), **d,** West Africa (4N-18N, 18W-0), **e,** East Africa (28S-0, 26E-40E), **f,** India (14N-30N, 70E-90E), **g,** Australia (40S-24S, 114W-156W), **h,** Asia (20N-40N, 100E-120E), **i,** Europe (40N-60N, 6W-50E). The fraction of land-based moisture (*f*) and available samples (n) over each subregion are shown as well.


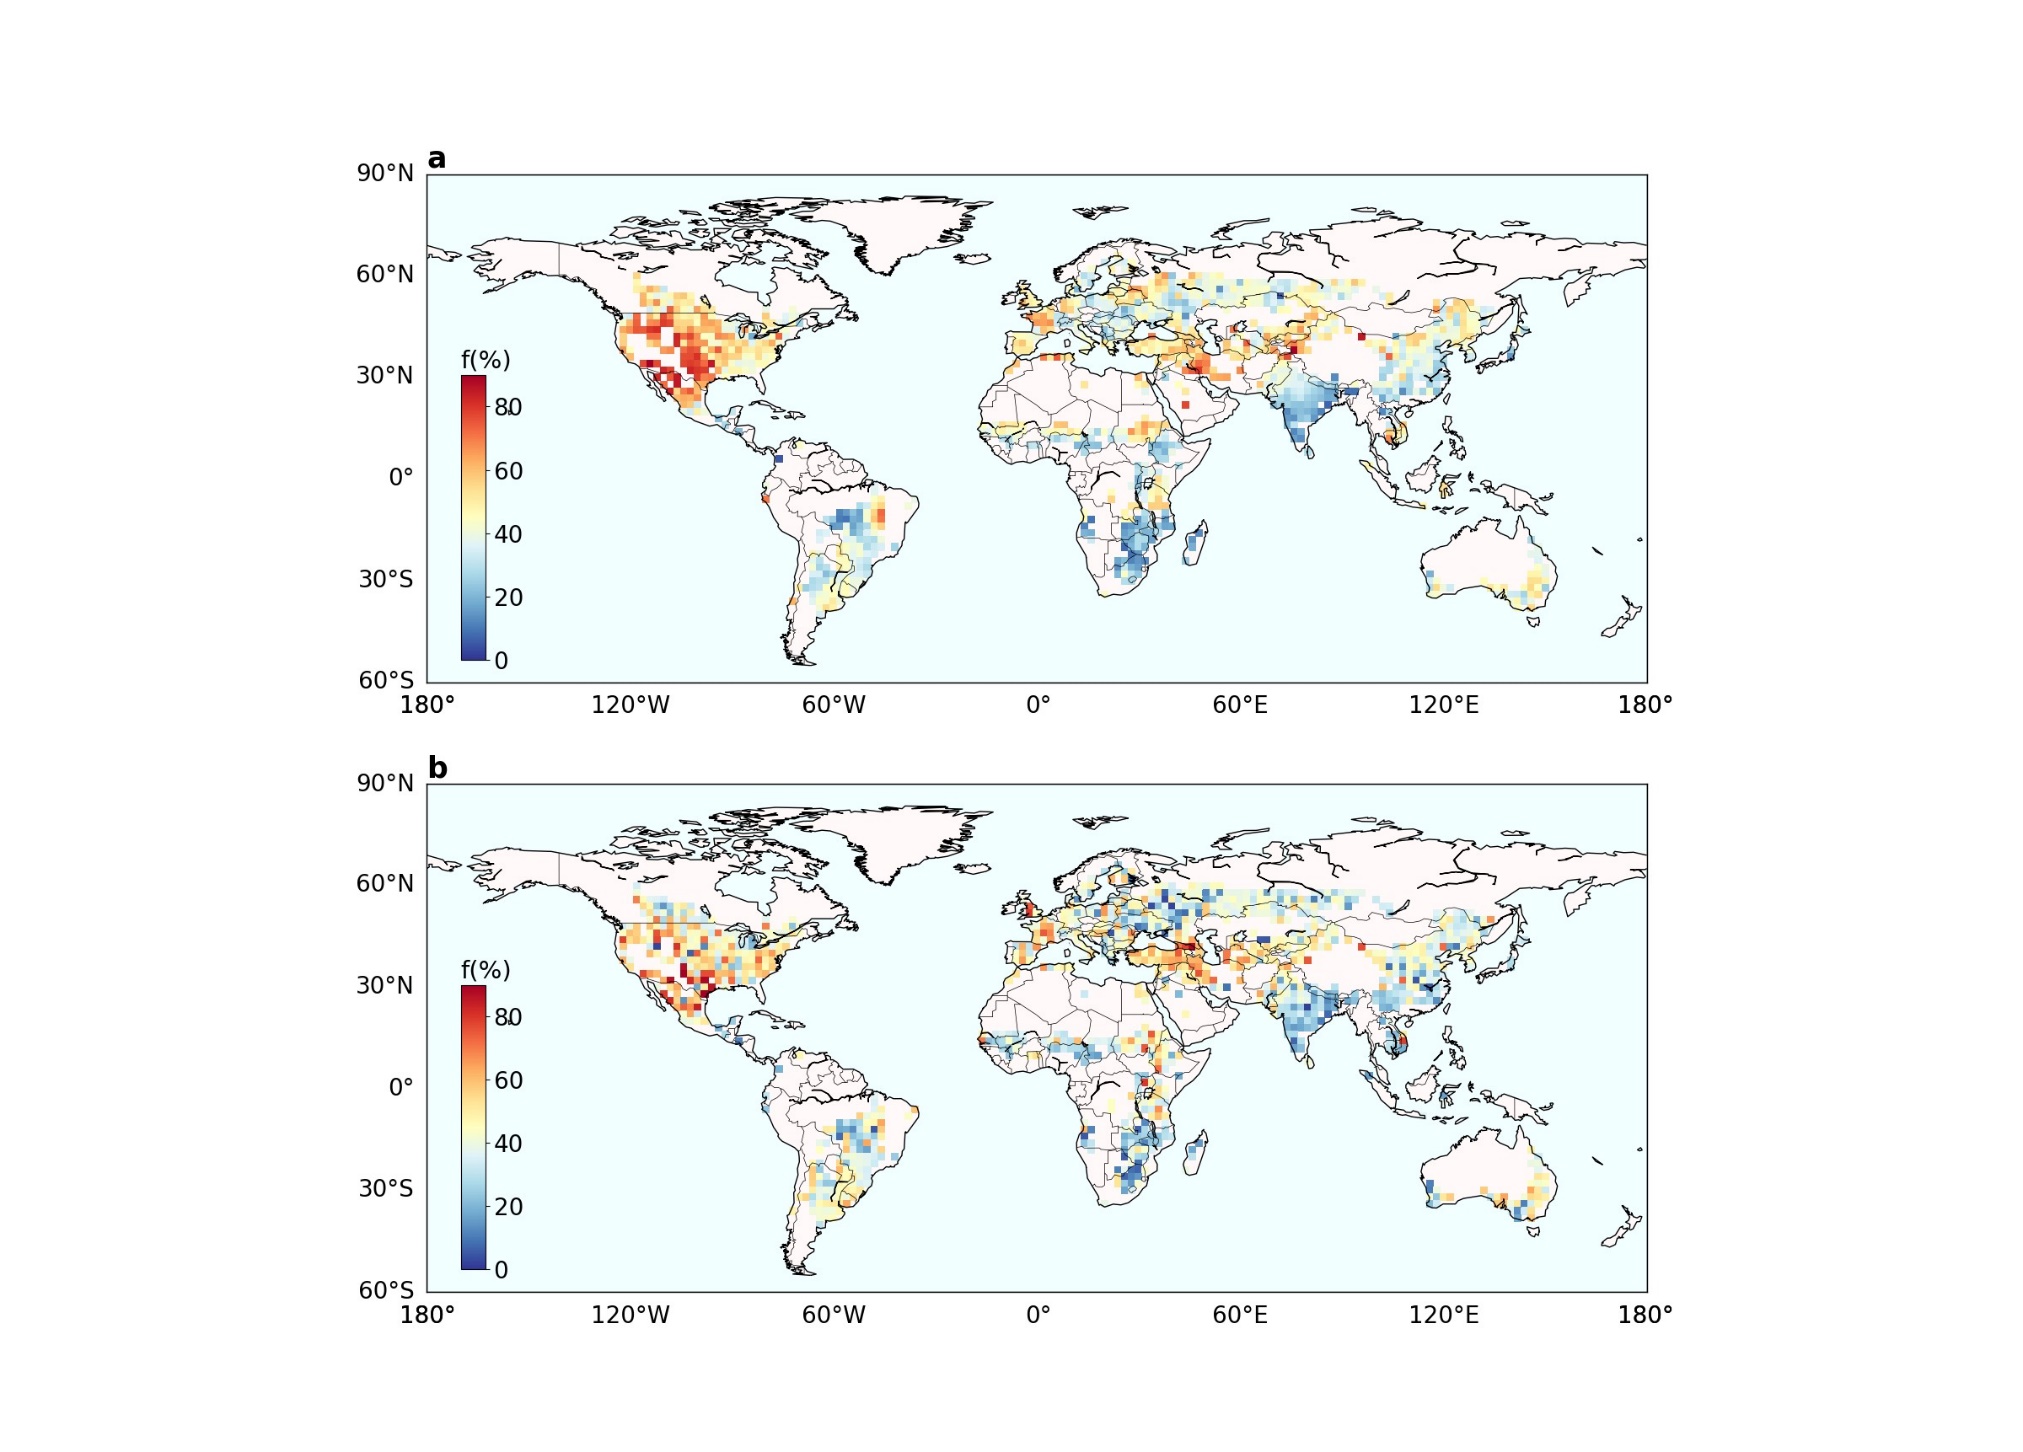


***Supplementary Figure 5*: Spatial patterns of the fraction of land-based moisture (, unit: %) during 2005-2011 from a,** AIRS and **b,** TES during the growing season.


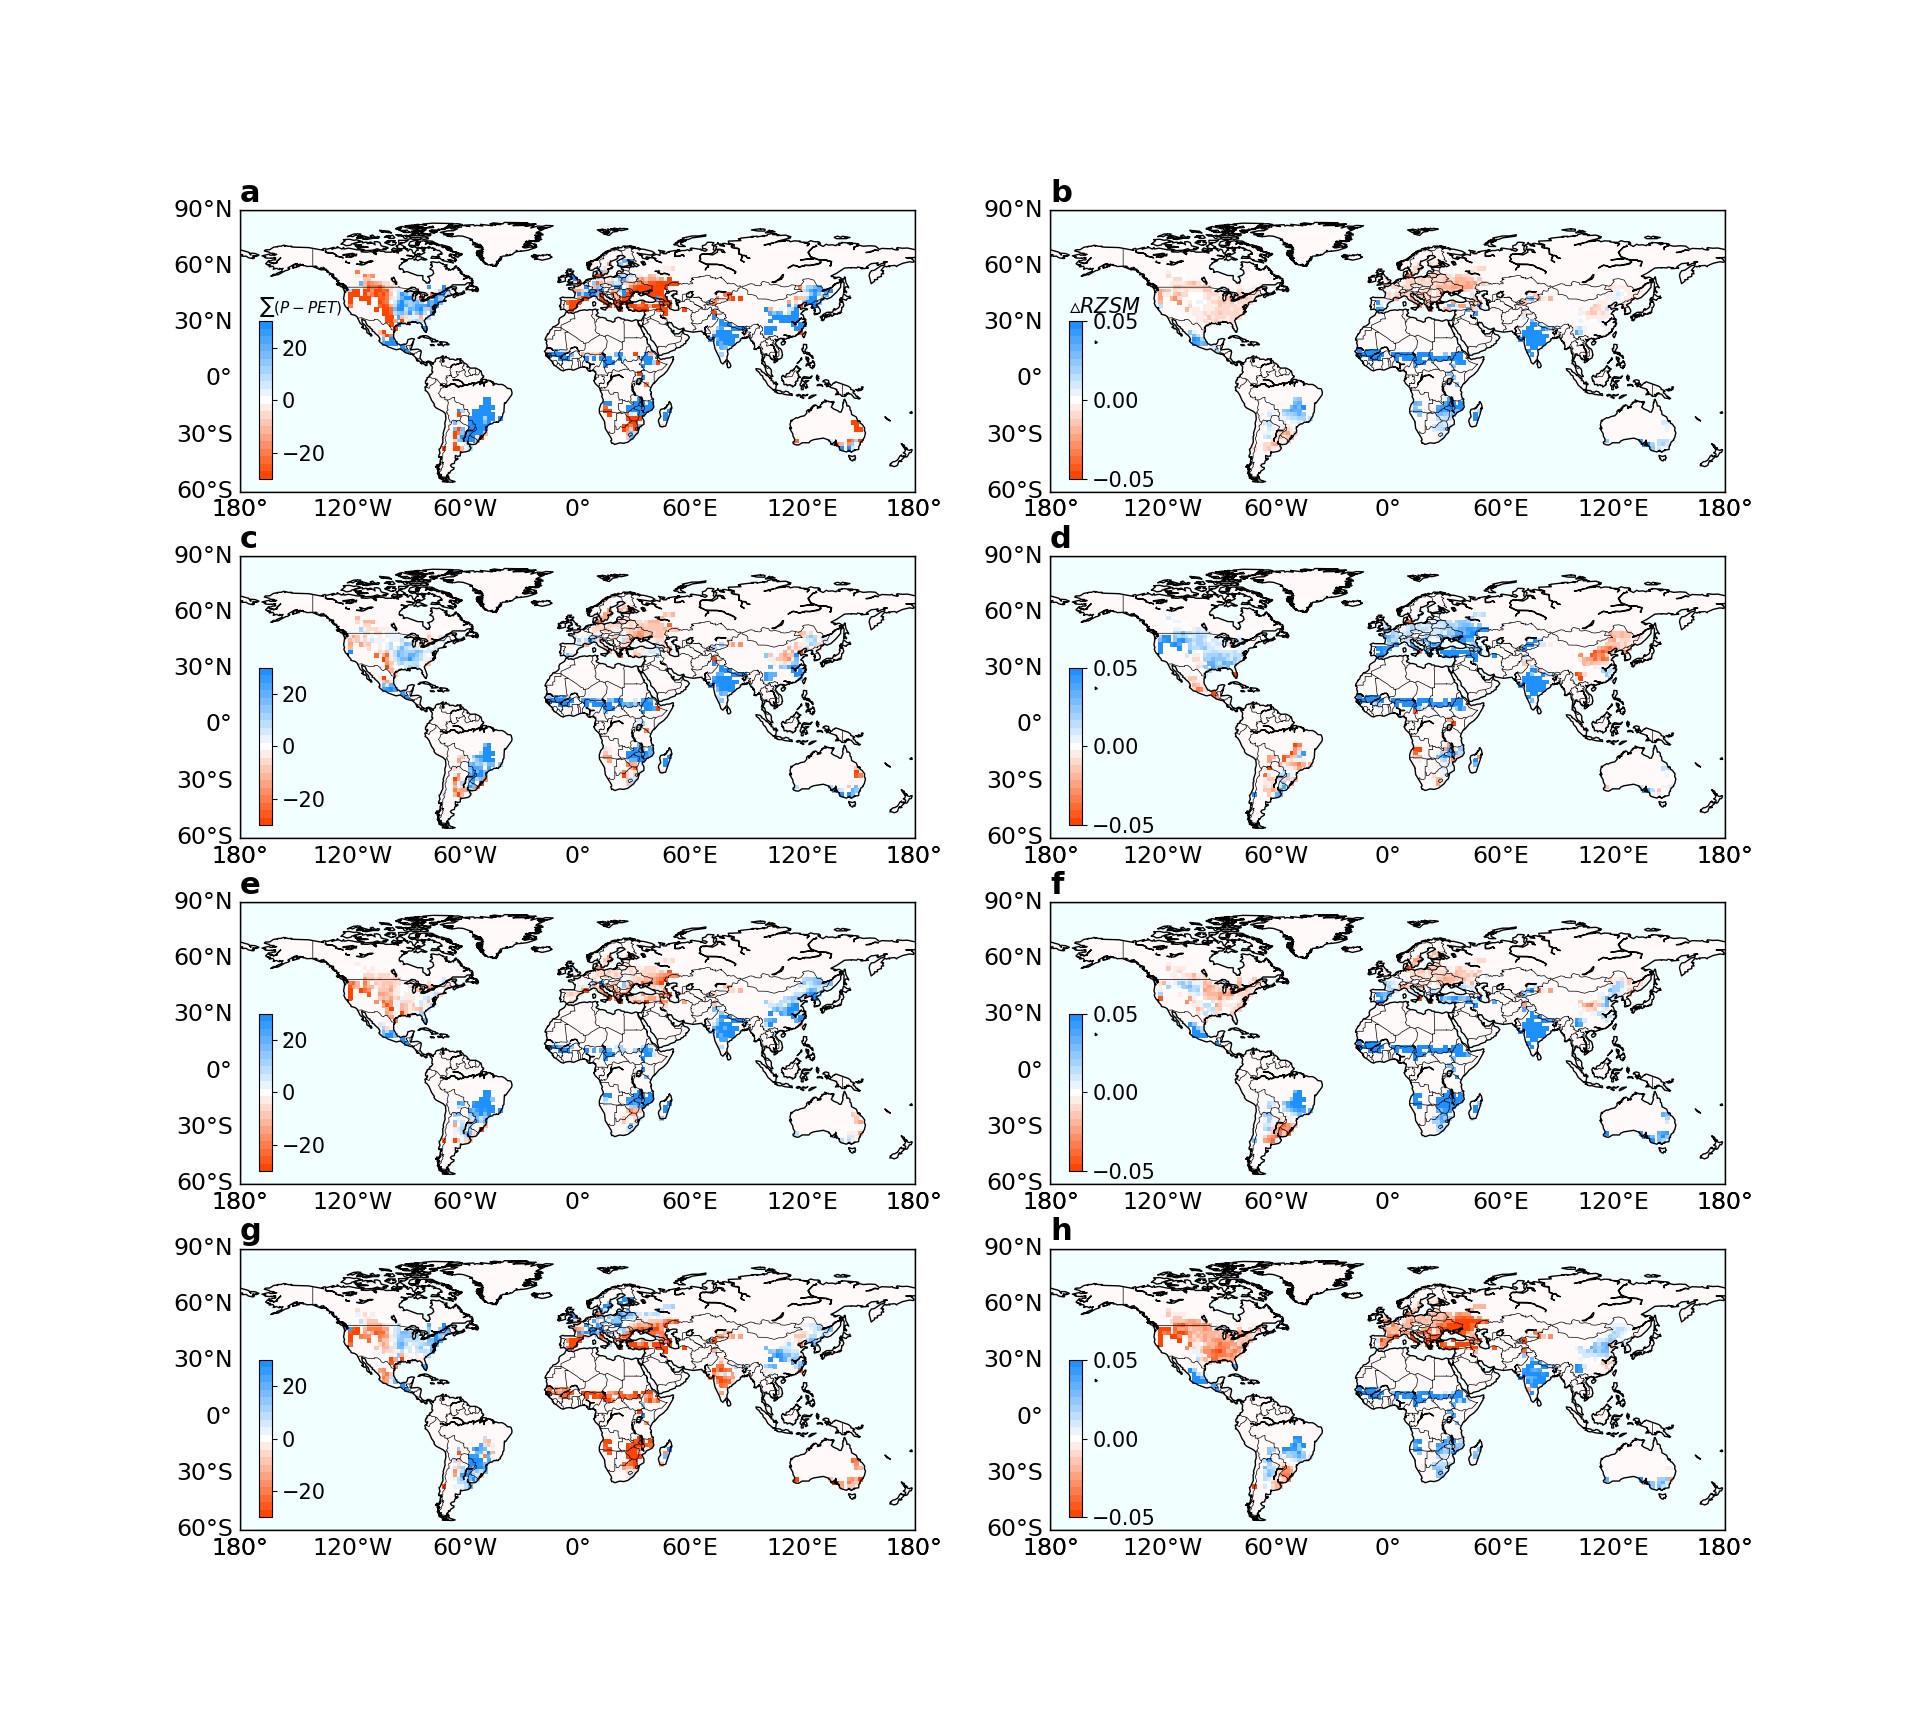


***Supplementary Figure 6*: Spatial patterns of long-term mean rainwater supply (mm; left column) and root-zone soil moisture (RZSM; m3/ m3; right column) during a-b,** the whole growing season, **c-d,** the vegetative stage, **e-f,** the reproductive stage, and **g-h,** the harvest time during 2003-2019**.**


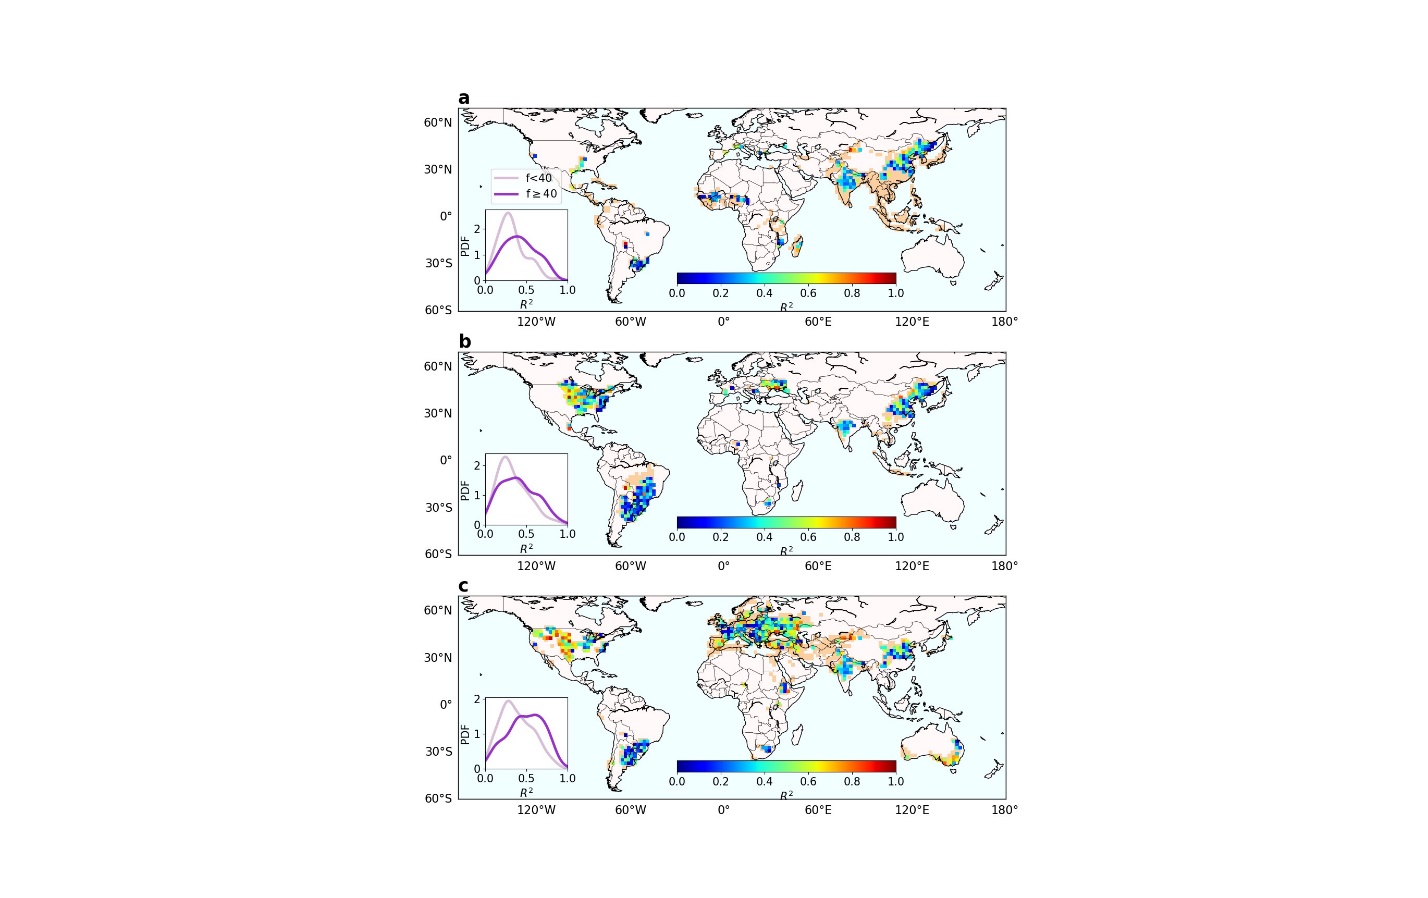


***Supplementary Figure 7*: Spatial patterns of *R2* of the multiple linear regression models of crop yield against rainwater supply and RZSM during the vegetative and reproductive stages for a,** rice, **b,** soybean,and **c,** winter wheat.Grids marked with light orange are crop grids not included in the regression for each crop type. The histograms of *R2* for crop grids with *f* 40% (dark purple) and *f* < 40% (light purple) are shown in the sub-panel for each crop type.


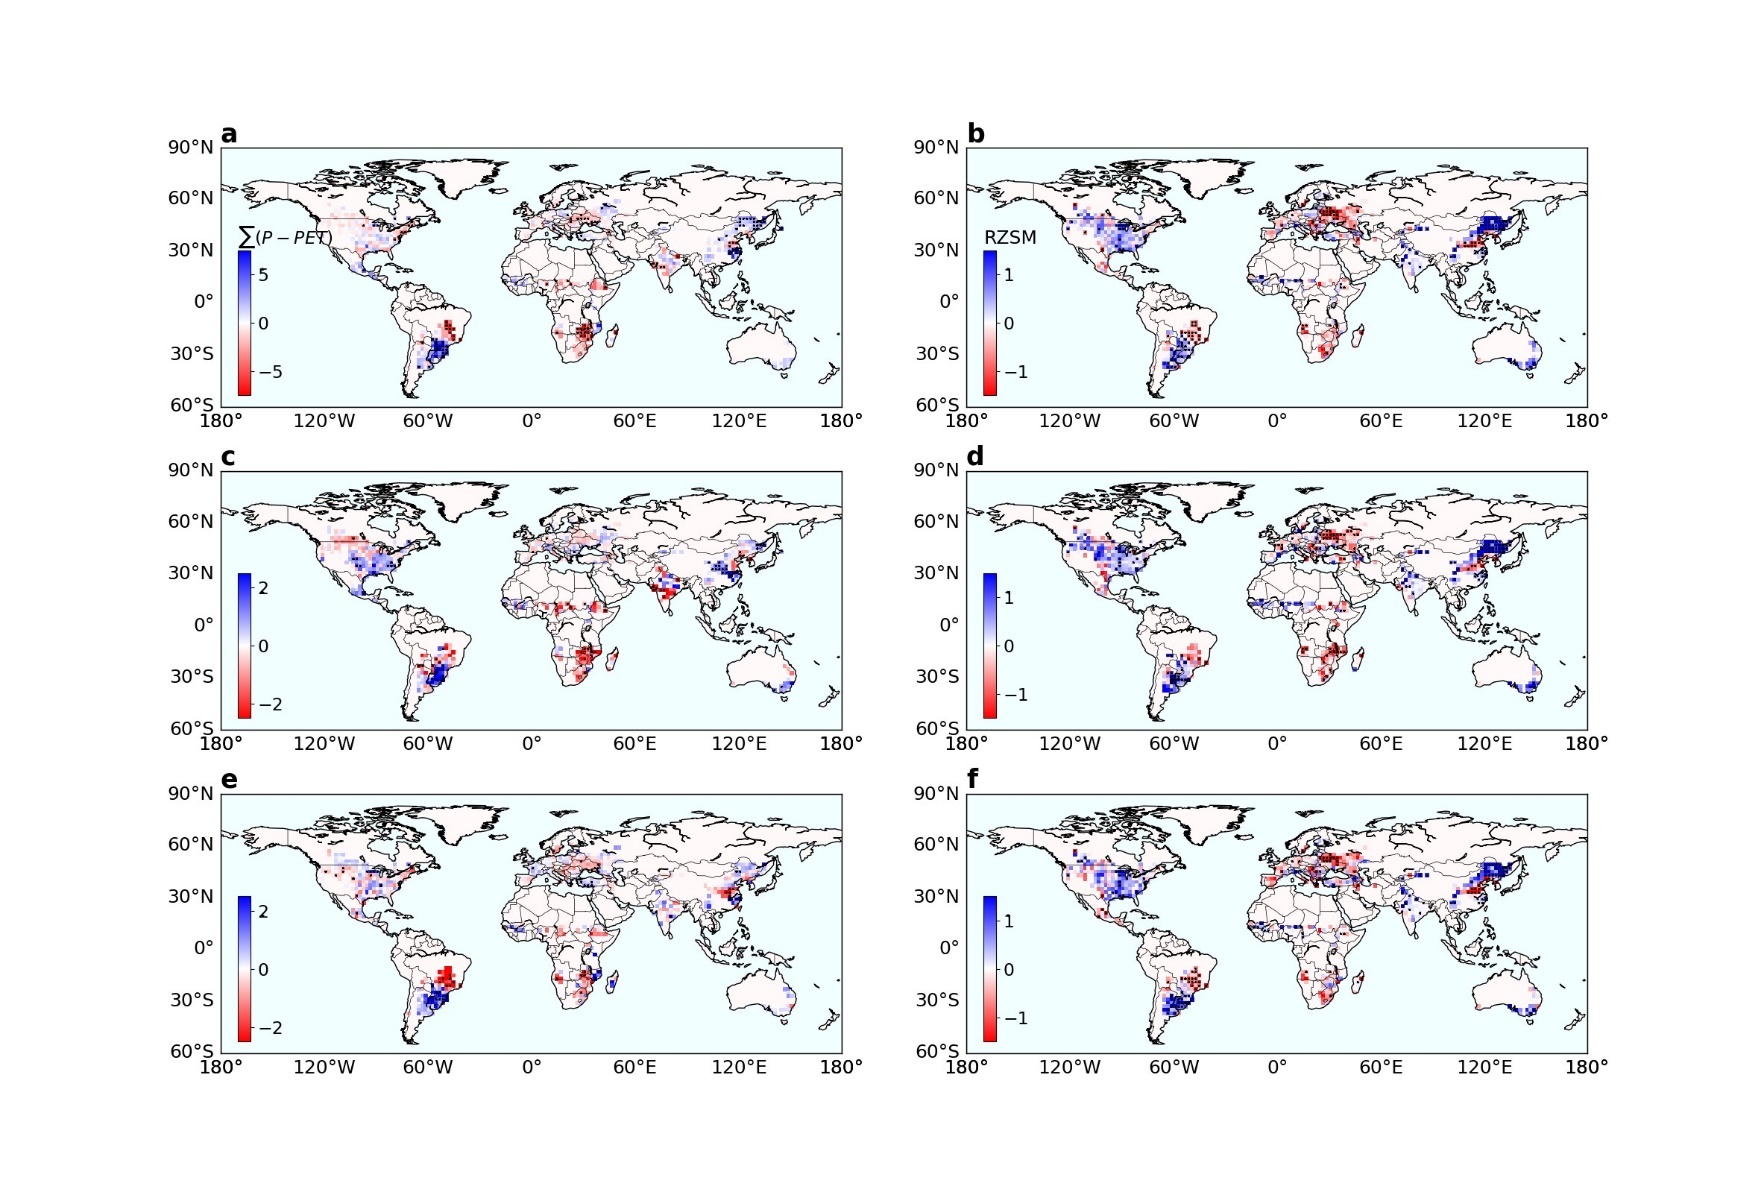


***Supplementary Figure 8*: Spatial patterns of linear trends of rainwater supply (mm/day/yr; left column) and RZSM (%/yr; right column) during a-b,** the whole growing season, **c-d,** the vegetative stage, and **e-f,** the reproductive stage for the period 2003-2019.Grids marked with black dots have a significant linear trend at *p* < 0.1.


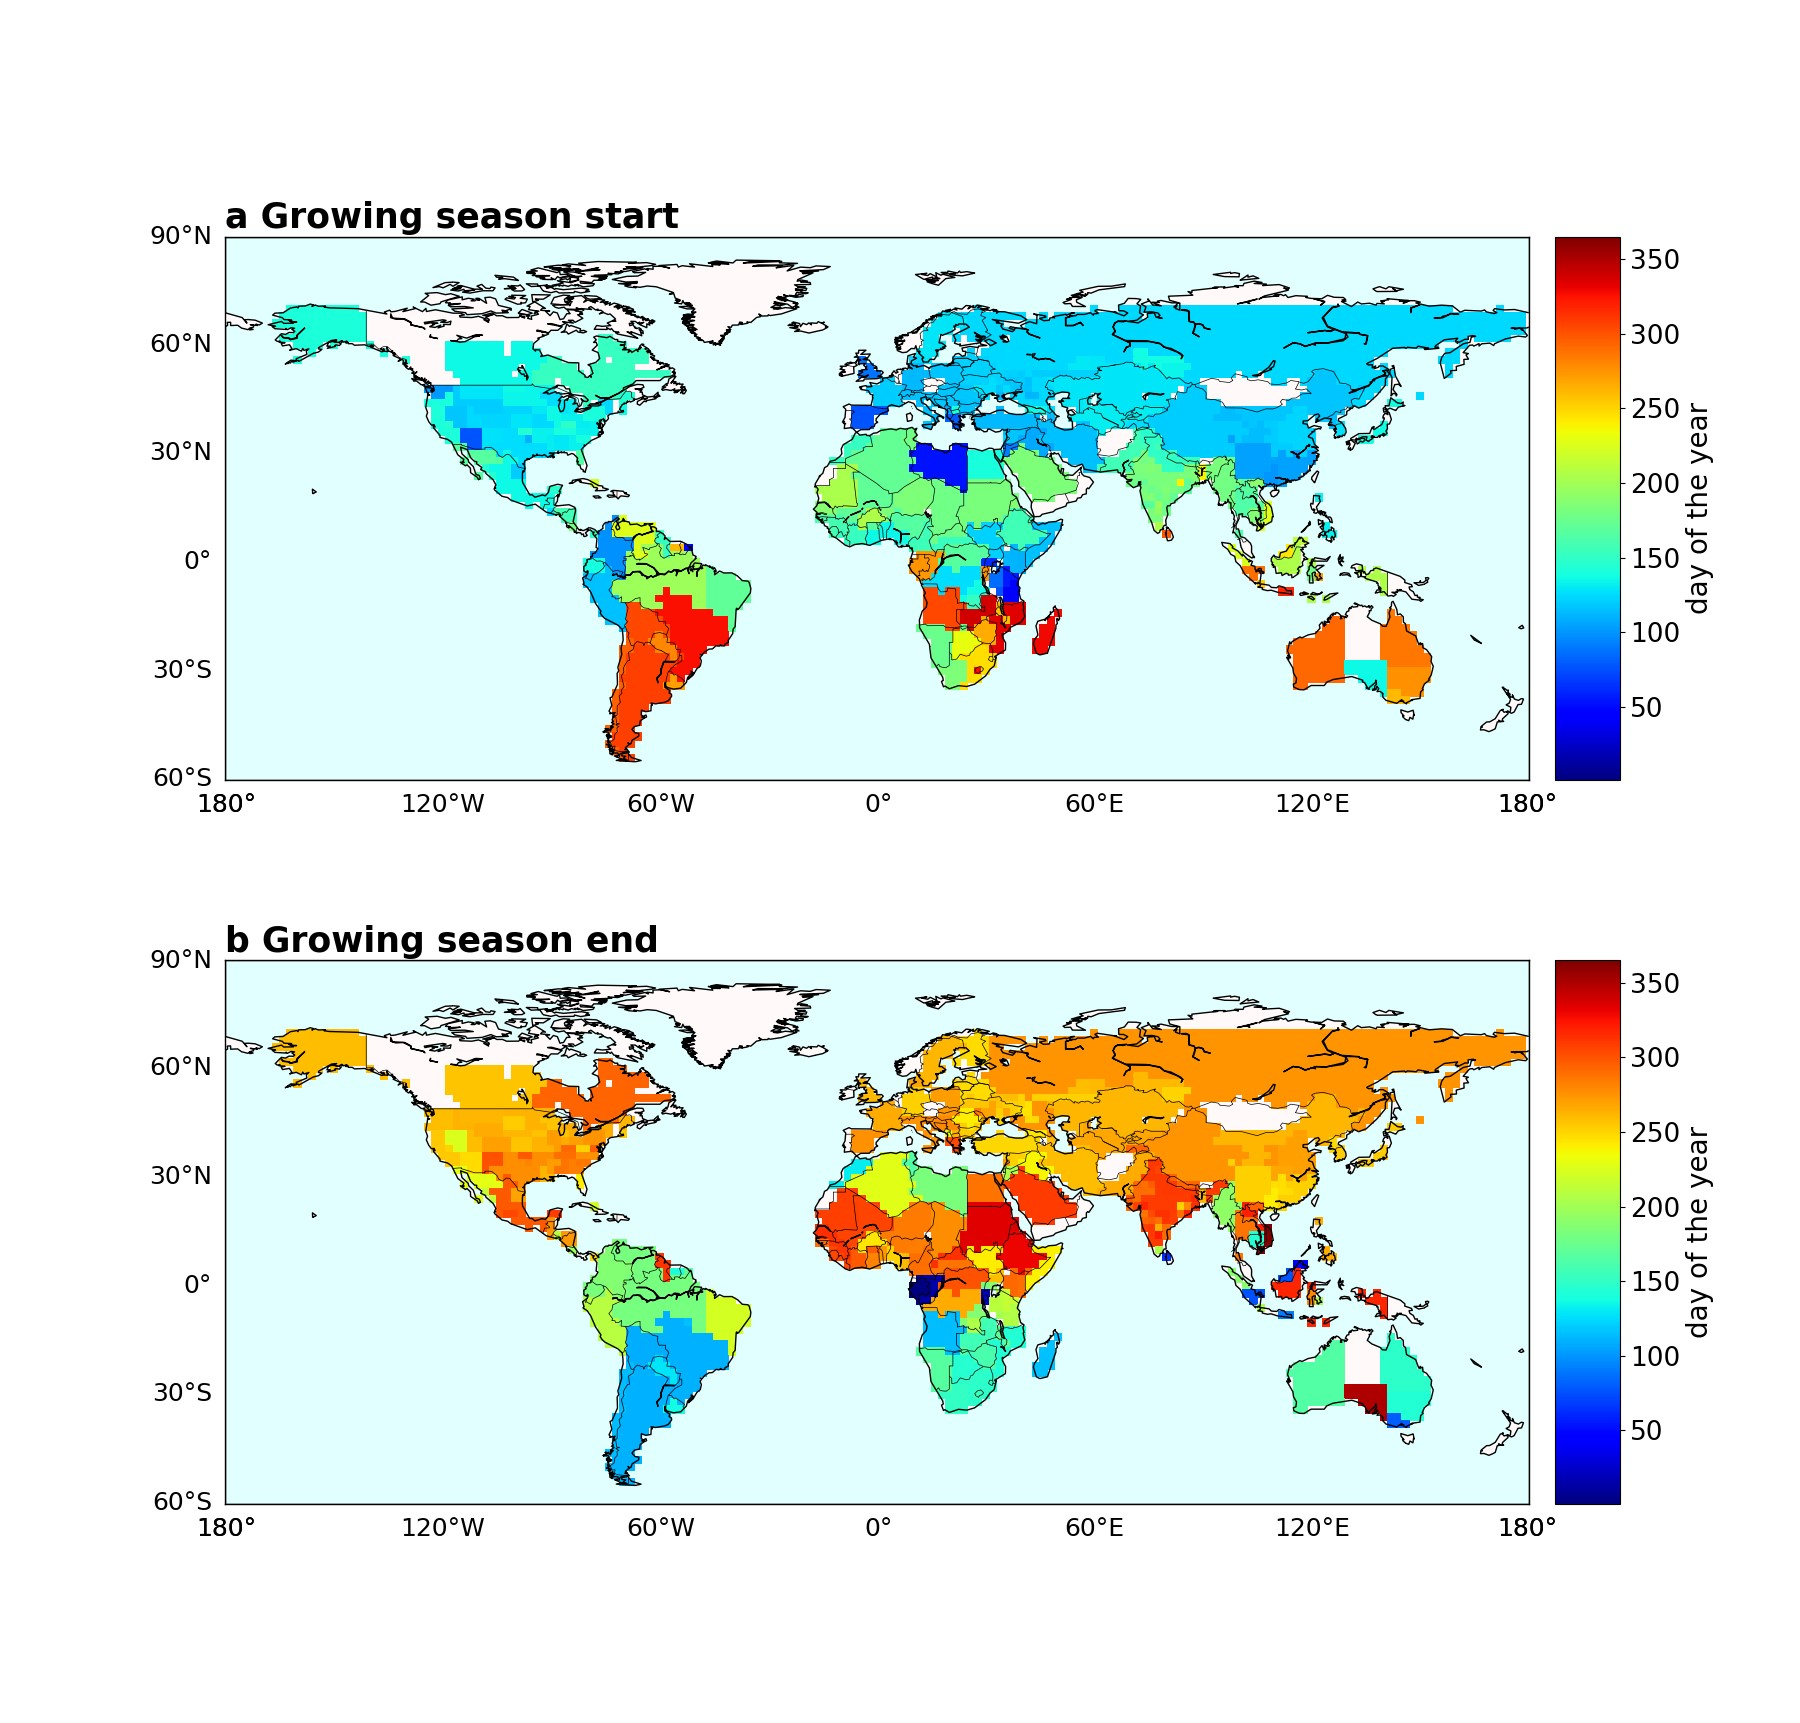


***Supplementary Figure 9*: Maps of conventional crop calendar (day of the year) merged from the 0.5 resolution global gridded crop calendar dataset covering 11 crops**2**.** **a,** Planting dates. **b,** Harvesting dates.


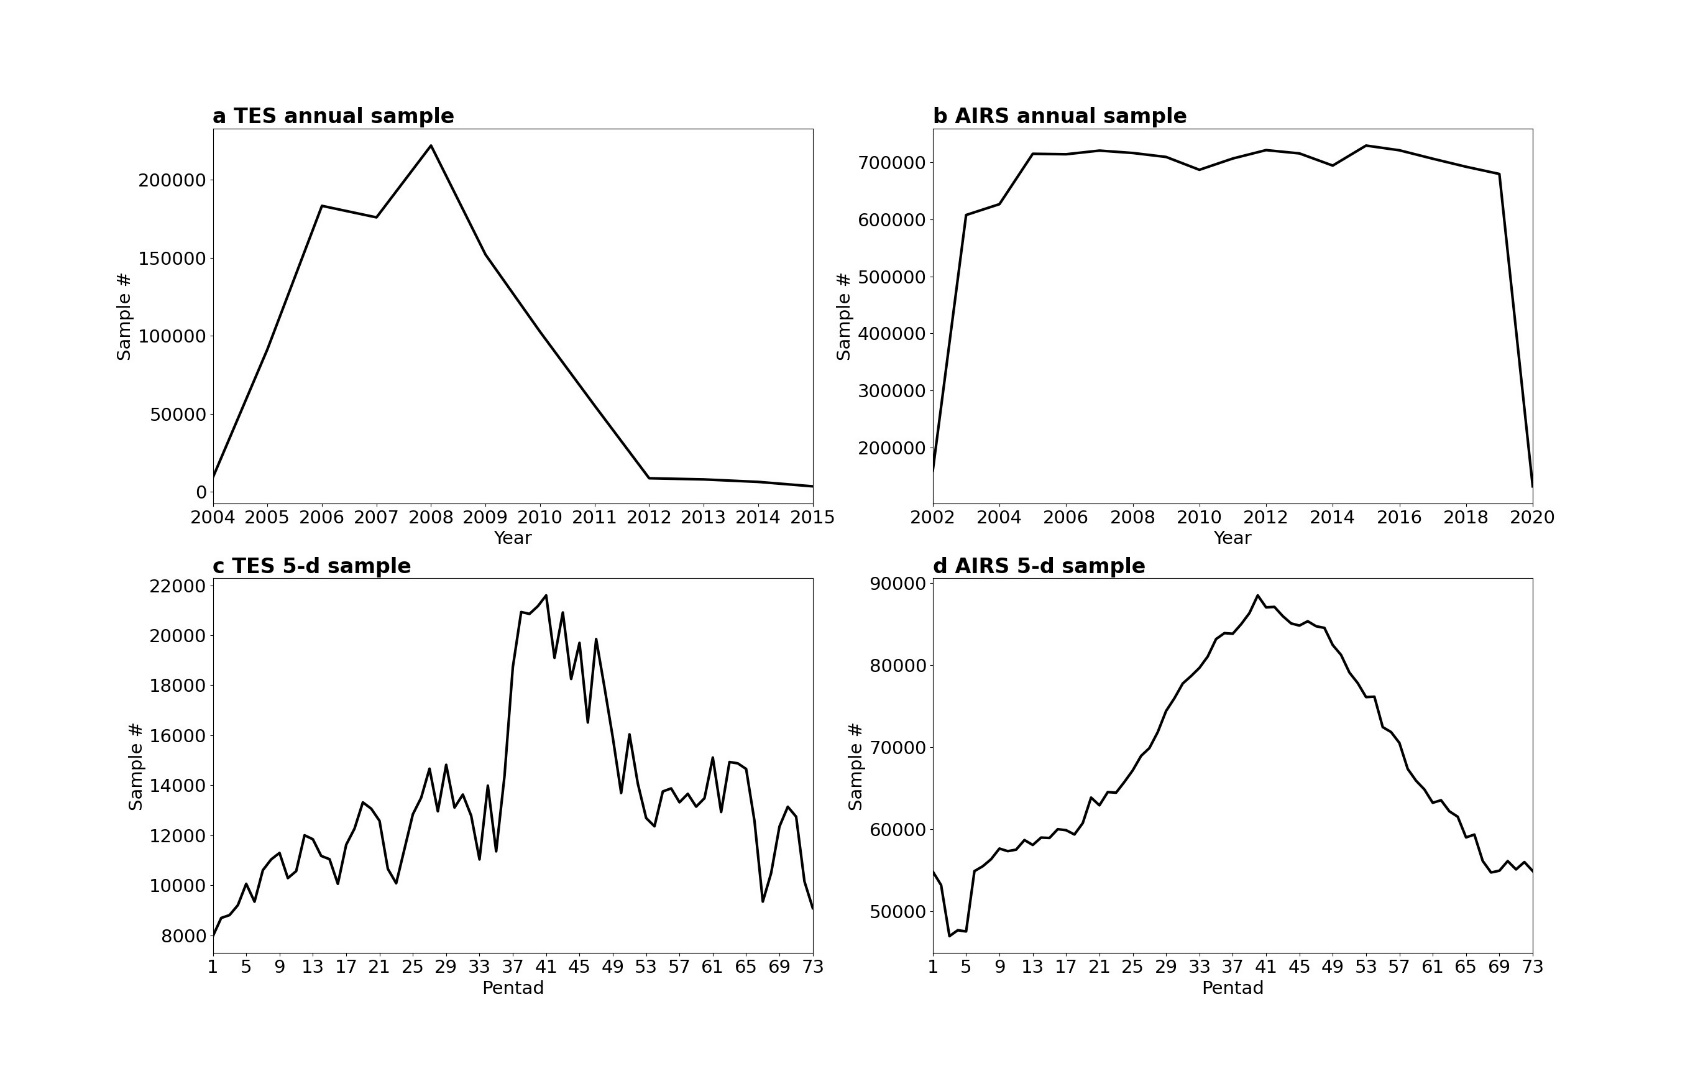


***Supplementary Figure 10*: Sample sizes of the TES and AIRS observations.** Annual sample number of **a,** TES and **b,** AIRS over the full time period of each dataset. Total sample numbers of **c,** TES and **d,** AIRS at 5-d (pentad) time interval for the period 2005-2011.


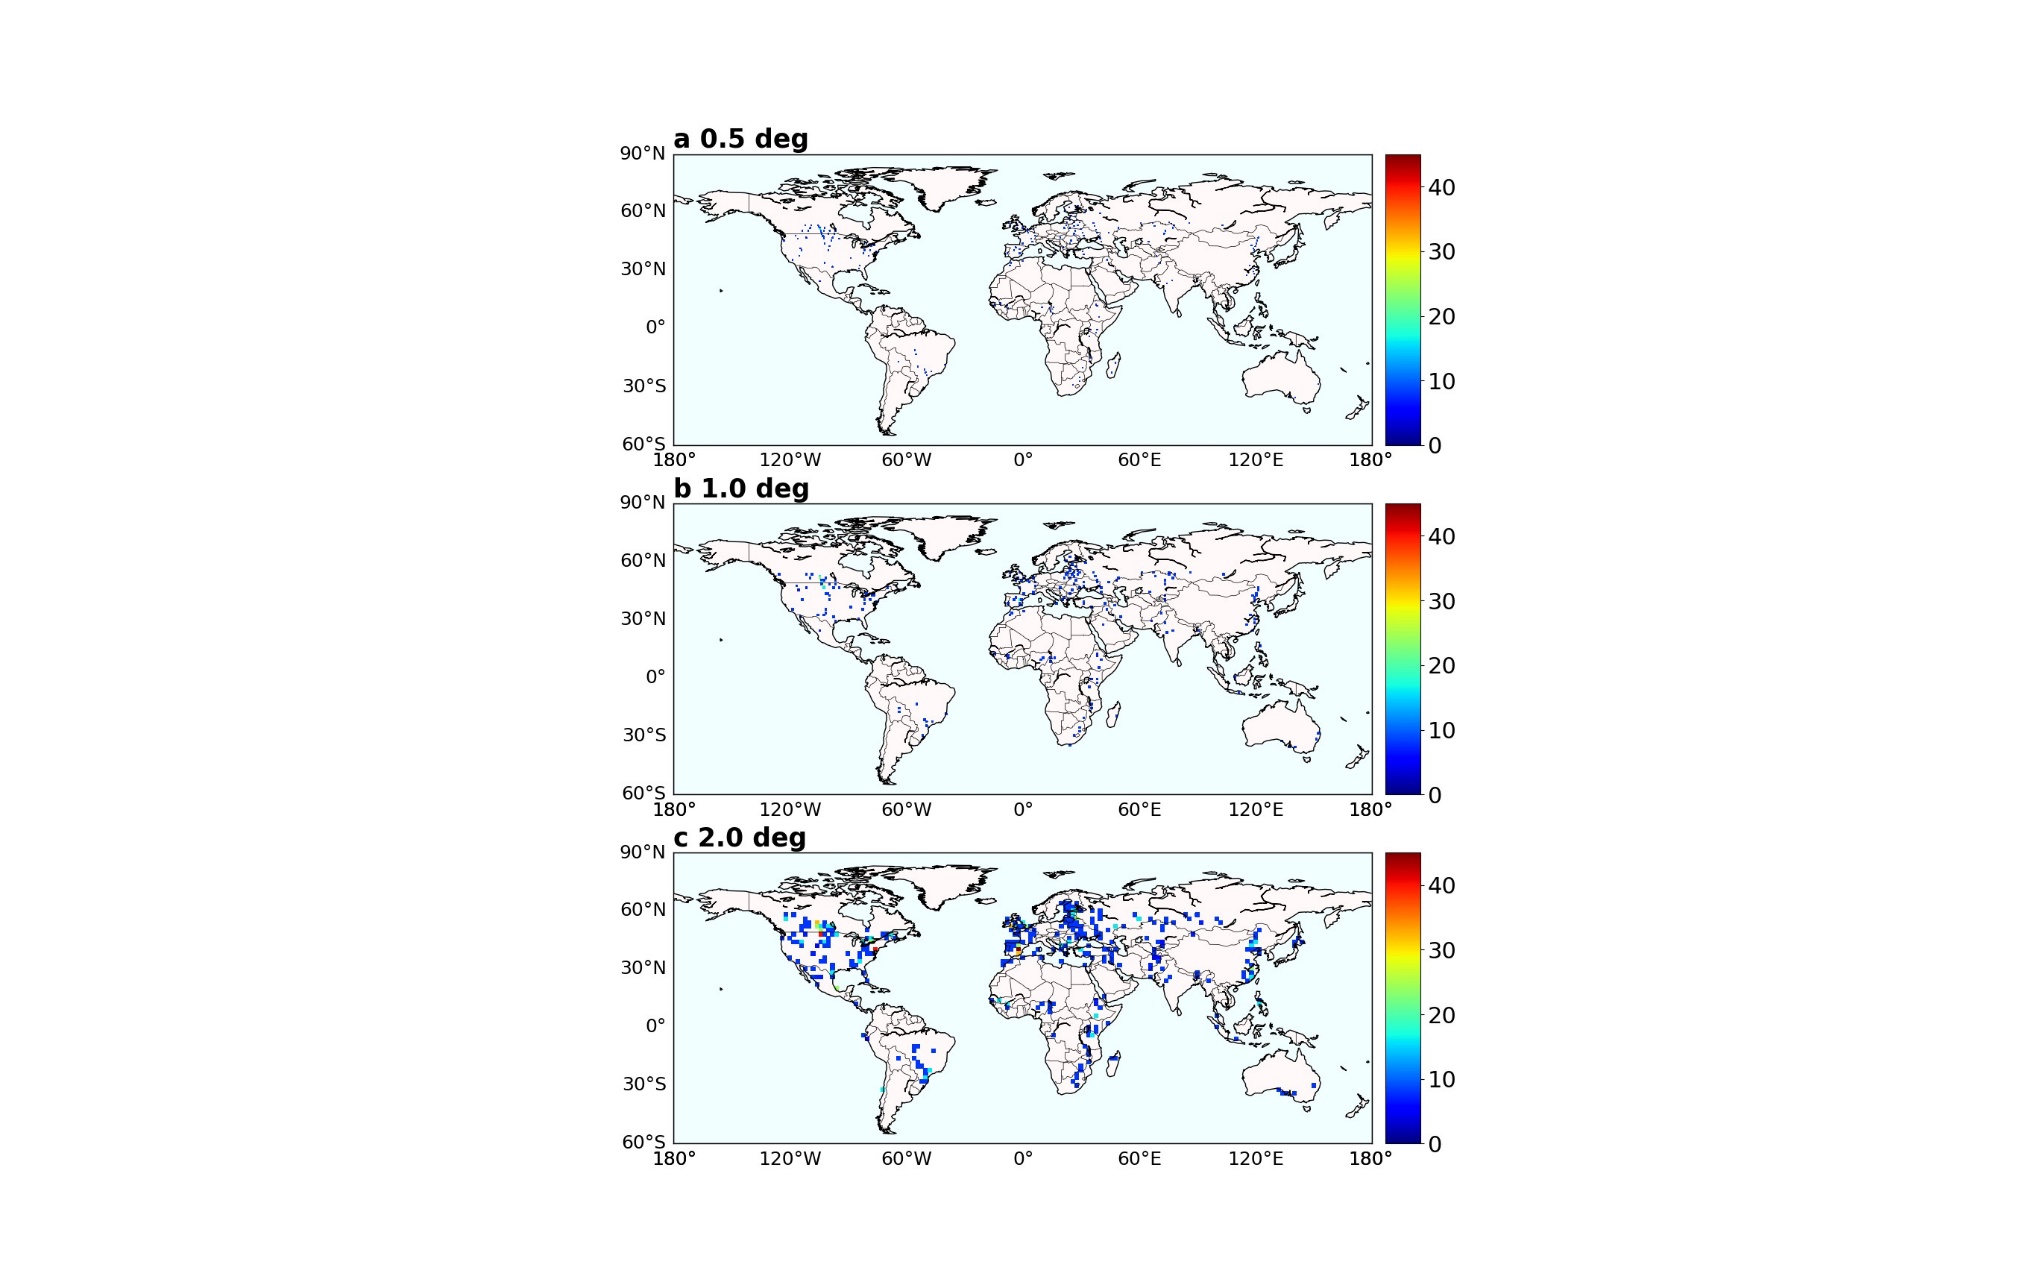


***Supplementary Figure 11*: Available observation between 908-348 hPa during the first pentad in July 2006 from TES observations at a,** 0.5, **b,** 1.0, and **c,** 2.0 that aligned with the cropland map.


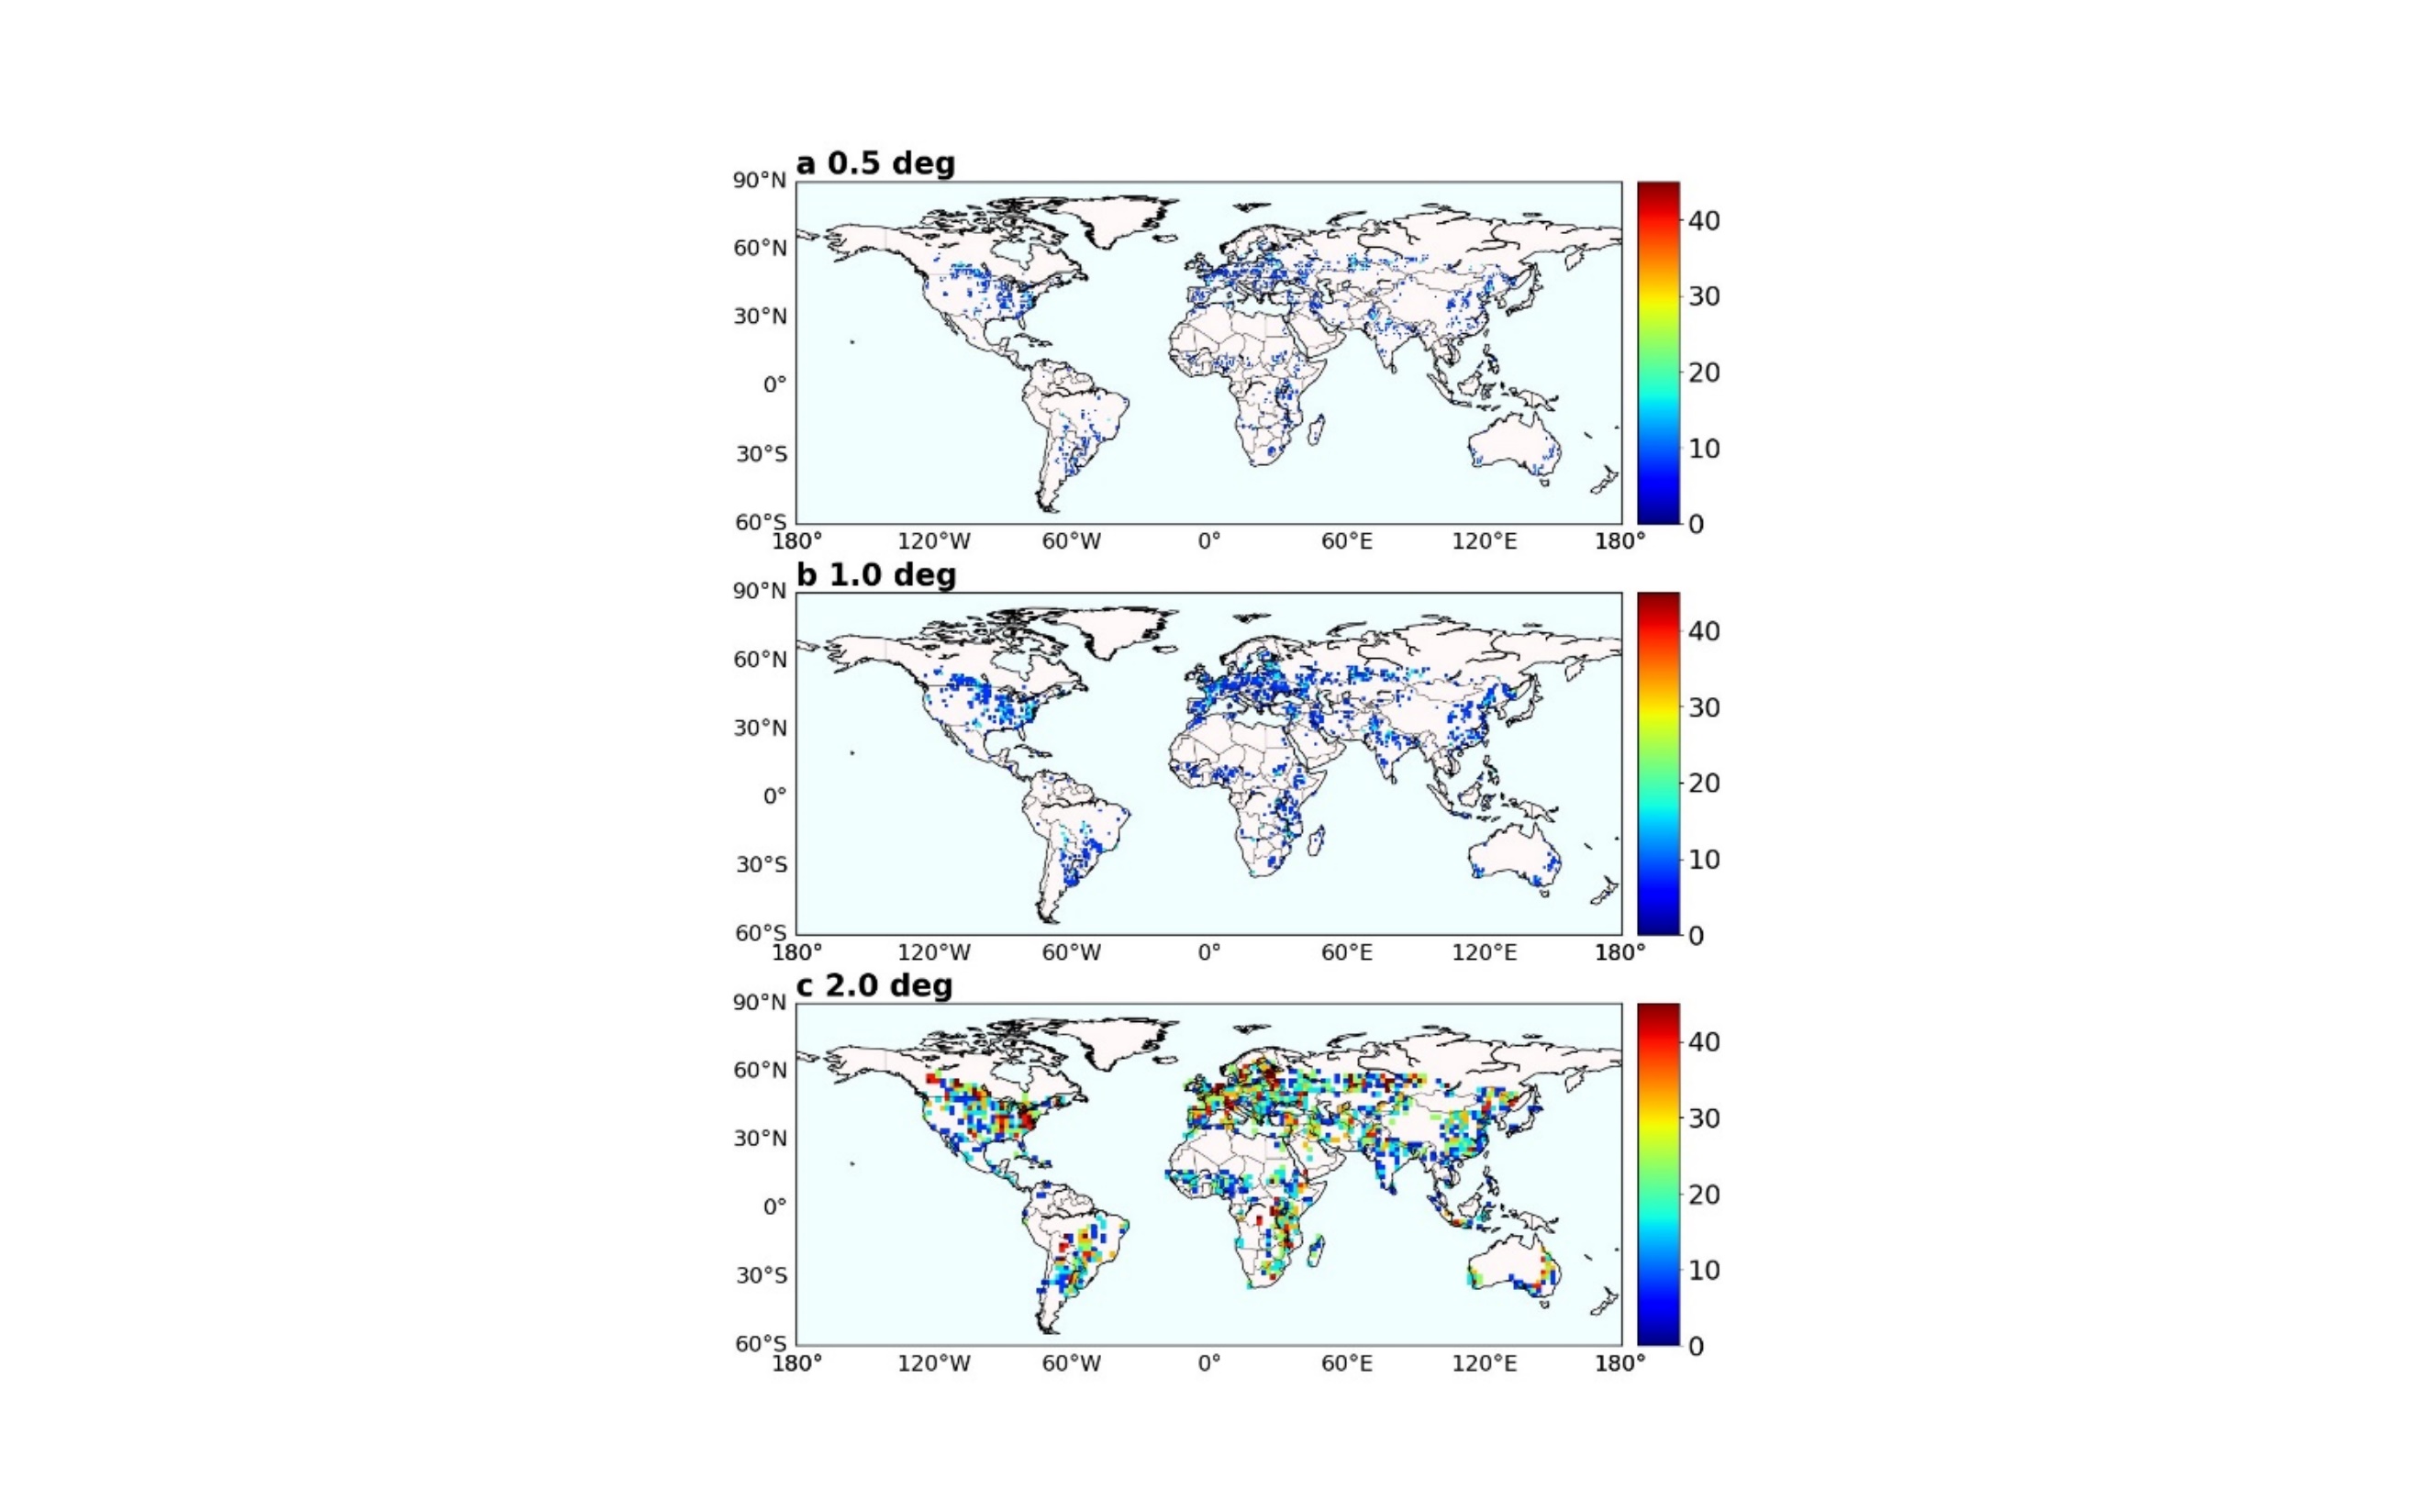


***Supplementary Figure 12*: The same as Supplementary Fig. 12 but from AIRS observations.**


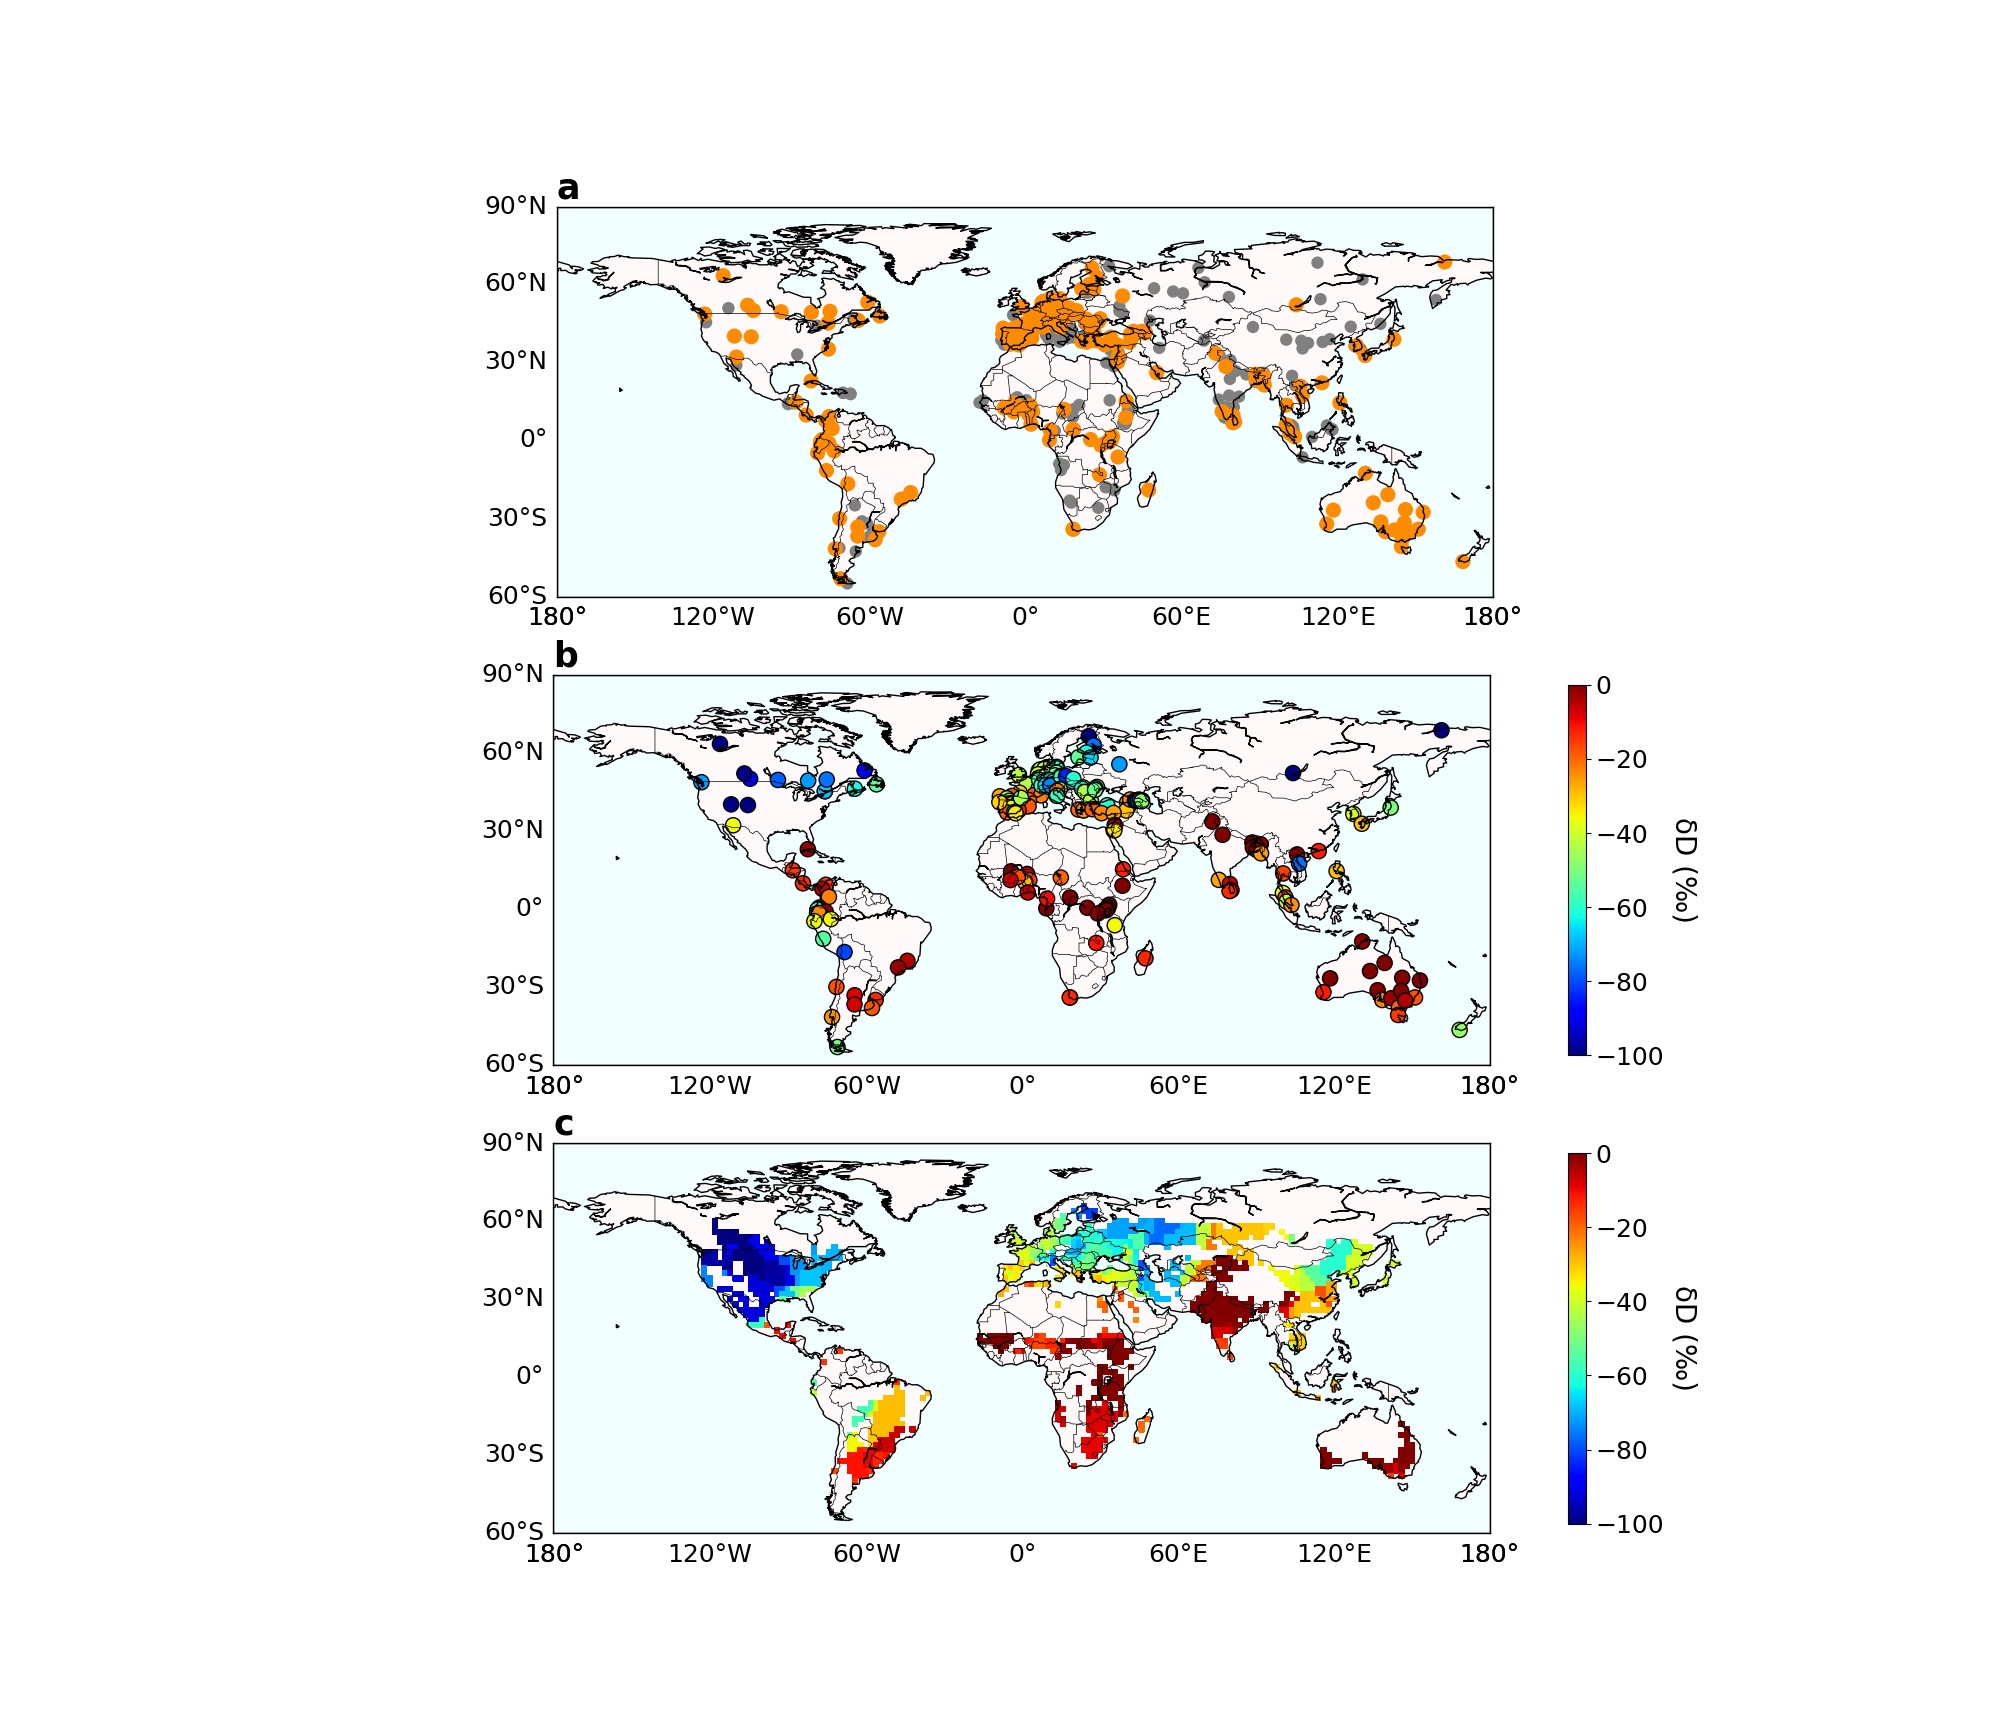


***Supplementary Figure 13*: Maps of gauge stations from the Global Network of Isotopes in precipitation (GNIP). a,** All stations from GNIP since 1960. Orange dots mark stations satisfying all data criteria to be used in this study. Gray dots mark stations not included. **b,** Monthly mean value during the transitional season constrained by intermediate precipitation and temperature levels. **c,** Interpolated transitional season mean aligned with the cropland extent map with the 2º resolution.

**References**

1. Noone, D. Pairing measurements of the water vapor isotope ratio with humidity to deduce atmospheric moistening and dehydration in the tropical midtroposphere. *J. Clim.* **25**, 4476–4494 (2012).

2. Sacks, W. J., Deryng, D., Foley, J. A. & Ramankutty, N. Crop planting dates: an analysis of global patterns. *Glob. Ecol. Biogeogr.* **19**, 607–620 (2010).
